# Supplementary material for: A Case of New Onset Cervical Dystonia in Pregnancy
Source: PubMed Central journal article supplement (PMC9783953; doi:10.5334/tohm.734), 2022-12-23
Supplement: tohm-12-1-734-s2.pdf [file tohm-12-1-734-s2.pdf]

Table 1. Review of existing Dystonia Gravidarum cases in the literature

|                                 | <b>Presentation and past medical history (PMH)</b>                                                                                                                  | <b>Phenotype</b>                                                                                                                              | <b>Outcome</b>                                                                                                        |
|---------------------------------|---------------------------------------------------------------------------------------------------------------------------------------------------------------------|-----------------------------------------------------------------------------------------------------------------------------------------------|-----------------------------------------------------------------------------------------------------------------------|
| <b>Lim et al. (2006)</b>        | 31 year old primigravid<br>Symptom onset: 1 <sup>st</sup> trimester (4/40)<br>PMH: Drug induced oculogyric crisis (prochlorperazine)                                | Torticollis to right, laterocollis to right, right shoulder elevation, head tremor. Left SCM hypertrophy. Geste antagoniste.                  | Reduced severity of symptoms through 2 <sup>nd</sup> trimester with complete resolution in 3 <sup>rd</sup> trimester. |
| <b>Fasano et al. (2007)</b>     | 28 year old, primigravid<br>Symptom onset: 1 <sup>st</sup> trimester (1/40)<br>PMH: Likely ET<br>FH: 2 sisters ET                                                   | Torticollis to right, laterocollis to left, left shoulder elevation. Left SCM hypertrophy, blepharospasm, postural tremor. Geste antagoniste. | Resolved 3 months after delivery                                                                                      |
| <b>Buccoliero et al. (2007)</b> | 28 year old, primigravid<br>Symptom onset: 1 <sup>st</sup> trimester (4/40)<br>PMH:ET, hypothyroidism                                                               | Torticollis to right, anterocollis, postural and intention tremor.                                                                            | Marked reduction in severity after delivery, complete resolution in 1 year.                                           |
| <b>Madu (2013)</b>              | 30 year old, primigravid,<br>Symptom onset: 2 <sup>nd</sup> trimester (17/40)                                                                                       | Anterocollis and retrocollis, left sholder elevation. Geste antagoniste.                                                                      | Resolved completely 6 weeks after delivery.                                                                           |
| <b>Current case</b>             | 36 year-old, secundigravid<br>Symptom onset: 1 <sup>st</sup> trimester (8/40)<br>PMH: Drug induced dystonic reaction (Prochlorperazine)<br>FH: mother blepharospasm | Torticollis to right, laterocollis to the left, and right shoulder elevation. Left SCM hypertrophy. Geste antagoniste.                        | Initial resolution of symptoms after delivery with recrudescence in 5 days and persistence of symptoms chronically    |
